# Supplementary material
Source: publisher site journal article supplement (https://www.spandidos-publications.com/1642/downloadSupplementary)
Supplement: Supplementary file 1 [file downloadSupplementary]

## Sheet: 工作表1
Table SI. Somatic mutations in the untranslated region of GAPDH.
Counts	Chr.position	chr	genomic	start	end	ref	Alt	func.refGene	gene.refGene	GeneDetail.refGene
11	chr12:6538319	12	NC_000012.12	6538319	6538319	-	C	UTR3	GAPDH	NM_001289745.2:c.*1325_*1326insC
5	chr12:6538195	12	NC_000012.12	6538195	6538195	A	G	UTR3	GAPDH	NM_001289745.2:c.*1111A>G
3	chr12:6534547	12	NC_000012.12	6534547	6534547	C	T	UTR5	GAPDH	NM_001289745.2:c.*31C>T
1	chr12:6538337	12	NC_000012.12	6538337	6538337	C	T	UTR3	GAPDH	NM_001289745.2:c.*1343C>T
1	chr12:6538227	12	NC_000012.12	6538227	6538227	G	A	UTR3	GAPDH	NM_001289745.2:c.*1233G>A
1	chr12:6538286	12	NC_000012.12	6538286	6538286	T	-	UTR3	GADPH	NM_001289745.2:c.*1926delT
